# Supplementary material
Source: PubMed Central journal article supplement (PMC6684872)
Supplement: NIHMS1013494-supplement-Supp_FigS1.pdf [file NIHMS1013494-supplement-Supp_FigS1.pdf]

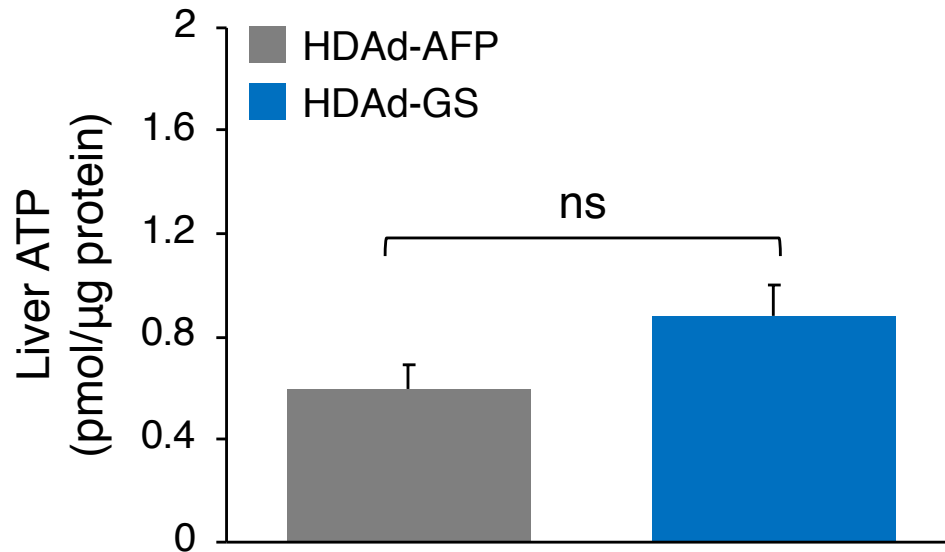

**Supplementary Fig. 1. ATP in livers of HDAd-GS and HDAd-AFP injected mice.** Hepatic content of ATP in livers of wild-type mice injected with HDAd-GS or HDAd-AFP at twelve weeks post-vector injection. (unpaired Student's t test;  $p= 0.1041$ ) ( $n = 5$ /group). Data represent averages  $\pm$  S.E.M. Abbreviations: ns = not significant.
